# Supplementary material for: Trends in Air and Water Temperatures at the Confluence of the Sava and Danube Rivers in Belgrade, Serbia
Source: Preprints.org preprint supplement (doi:10.20944/preprints202404.0252.v1), 2024-04-03
Supplement: Supplementary file 1 [file supplementary]

## FIGURE CAPTIONS

**Figure 1** Study area with measurement stations: 1-Danube Zemun; 2-Sava Belgrade; 3-Belgrade observatory.

**Figure 2** Schematic presentation of water temperature measurement stations (A) and discharge measurement stations (B)

**Figure 3** Time series of the mean annual water temperature measured at Danube Zemun (blue), Sava Belgrade (red), and air temperature measured at Belgrade observatory (green) during the 1956-2020 period.

**Figure 4** RAPS arrays: Danube Zemun (blue), Sava Belgrade (red), Belgrade observatory (green)

**Figure 5** Time series of the mean annual water temperature measured at Danube Zemun (blue), Sava Belgrade (red), and the mean annual air temperature measured at Belgrade observatory (green), calculated for two sub-periods defined by the results of the RAPS method (see Figure 4)

**Figure 6** Time series of differences,  $\Delta T$ , between the mean annual temperatures: TWS –TWD (Sava Belgrade – Danube Zemun), TAB-TWD (Belgrade observatory - Danube Zemun), TWS-TAB (Sava Belgrade - Belgrade observatory) during the 1956-2020 period.

**Figure 7** Relationship between the mean annual water temperature measured at Sava Belgrade and Danube Zemun during the 1956-2020 period.

**Figure 8** Relationships between the mean annual water temperature and mean annual discharges for Danube Zemun (blue) and Sava Beograd (red) during the 1956-2020 period.

**Figure 9** Histograms of the average monthly discharges of Sava (red) and Danube (blue) during the 1956-2020 period.

**Figure 10** Histograms of the average monthly Danube Zemun (blue) and Sava Belgrade (red) water temperature and Belgrade Observatory air temperature during the 1956-2020 period.

**Figure 11** Histograms of differences,  $\Delta T$ , between the average monthly temperatures: TS –TD (Sava Belgrade – Danube Zemun), TB-TD (Belgrade observatory - Danube Zemun), TS-TB (Sava Belgrade - Belgrade observatory) during the 1956-2020 period.
