# Supplementary material for: Trends in Air and Water Temperatures at the Confluence of the Sava and Danube Rivers in Belgrade, Serbia
Source: Preprints.org preprint supplement (doi:10.20944/preprints202404.0252.v1), 2024-04-03
Supplement: Supplementary file 1 [file supplementary]

**Table 2** List of the slope of the linear equation, a, the coefficient of determination, R2, and M-K probability values, p, calculated from the time series of the mean monthly and annual water and air temperatures at three analysed stations during the 1956-2020 period

| **month**  **year** | **Danube** | | | **Sava** | | | **Belgrade** | | |
| --- | --- | --- | --- | --- | --- | --- | --- | --- | --- |
| **a**  **(ºC/10 year)** | **R2** | **p** | **a**  **(ºC/10 year)** | **R2** | **p** | **a**  **(ºC/10 year)** | **R2** | **p** |
| **Jan.** | 0.297 | 0.179 | 0.0001 | 0.407 | 0.292 | 3.2E-06 | 0.428 | 0.108 | 0.019 |
| **Feb.** | 0.270 | 0.111 | 0.005 | 0.402 | 0.193 | 0.0007 | 0.415 | 0.0537 | 0.063 |
| **Mar.** | 0.383 | 0.140 | 0.006 | 0.414 | 0.187 | 0.002 | 0.492 | 0.136 | 0.006 |
| **Apr.** | 0.246 | 0.131 | 0.004 | 0.258 | 0.139 | 0.003 | 0.397 | 0.172 | 0.0005 |
| **May** | 0.280 | 0.124 | 0.009 | 0.316 | 0.109 | 0.012 | 0.314 | 0.112 | 0.011 |
| **Jun.** | 0.331 | 0.155 | 0.001 | 0.427 | 0.182 | 0.002 | 0.421 | 0.233 | 0.0001 |
| **Jul.** | 0.461 | 0.303 | 5.8E-06 | 0.549 | 0.292 | 3.5E-05 | 0.538 | 0.387 | 4.8E-07 |
| **Aug.** | 0.593 | 0.394 | 1.9E-07 | 0.625 | 0.374 | 2.2E-07 | 0.602 | 0.332 | 2.9E-06 |
| **Sep.** | 0.327 | 0.201 | 0.0005 | 0.573 | 0.285 | 1.9E-05 | 0.310 | 0.109 | 0.022 |
| **Oct.** | 0.289 | 0.234 | 2.7E-05 | 0.454 | 0.274 | 8.6E-06 | 0.235 | 0.0695 | 0.024 |
| **Nov.** | 0.320 | 0.214 | 0.0003 | 0.414 | 0.329 | 4.3E-06 | 0.257 | 0.0418 | 0.121 |
| **Dec.** | 0.339 | 0.216 | 0.0002 | 0.436 | 0.346 | 9.2E-07 | 0.229 | 0.0417 | 0.064 |
| **year** | 0.344 | 0.548 | 6.7E-11 | 0.440 | 0.655 | 1.0E-12 | 0.389 | 0.548 | 4.3E-10 |

Numbers in blue mean that 0.01<p<0.05; numbers in red mean that p<0.01
