# Supplementary material for: Trends in Air and Water Temperatures at the Confluence of the Sava and Danube Rivers in Belgrade, Serbia
Source: Preprints.org preprint supplement (doi:10.20944/preprints202404.0252.v1), 2024-04-03
Supplement: Supplementary file 2 [file supplementary]

## Article

# Trends in Air and Water Temperatures at the Confluence of the Sava and Danube Rivers in Belgrade, Serbia

Ognjen Bonacci <sup>1</sup>, Ana Žaknić-Ćatović <sup>2\*</sup>, Tanja Roje-Bonacci <sup>1</sup>, Stevan Prohaska <sup>3</sup>, Duje Bonacci <sup>4</sup>, Samir Ćatović <sup>5</sup>

<sup>1</sup> Faculty of Civil Engineering, Architecture and Geodesy, Split University, Matice Hrvatske 15, 21000 Split, Croatia; [obonacci@gradst.hr](mailto:obonacci@gradst.hr)

<sup>2</sup> Department of Physical and Environmental Sciences, University of Toronto Scarborough, 1265 Military Trail, Scarborough, Toronto, ON M1C 1A4, Canada; [ana.zaknic.catovic@utoronto.ca](mailto:ana.zaknic.catovic@utoronto.ca)

<sup>3</sup> Jaroslav Černi Water Institute, Jaroslava Černog 80, Pinosava, 11226 Beograd, Serbia; [stevan.prohaska@j.cerni.rs](mailto:stevan.prohaska@j.cerni.rs)

<sup>4</sup> University of Zagreb, Faculty of Croatian Studies, 10000 Zagreb, Borongajska Cesta 83d, Croatia; [dbonacci@hrstud.hr](mailto:dbonacci@hrstud.hr)

<sup>5</sup> Republic Hydrometeorological Service of Serbia, 11030 Belgrade, Kneza Višeslava 30, Serbia; [samir.catovic@hidmet.gov.rs](mailto:samir.catovic@hidmet.gov.rs)

\* Correspondence: [ana.zaknic.catovic@utoronto.ca](mailto:ana.zaknic.catovic@utoronto.ca) (OB, AZC)

**Abstract:** This study investigates the mean annual water temperature trends at the confluence of the Sava and Danube Rivers, along with air temperature trends at the Belgrade meteorological station, spanning from 1956 to 2020. Results reveal a consistent increase in temperature across all three measuring stations, with the Danube experiencing a rise of 0.34°C/10 years, the Sava at 0.44°C/10 years, and Belgrade's air temperature increasing by 0.39°C/10 years. Employing the RAPS method, sharp rises in water temperature were pinpointed in 1989 for the Sava and 1990 for the Danube, while Belgrade's air temperature surge began in 1998. The highest intensity of air temperature increase within the recent period (1998–2020) was observed at the Belgrade observatory, reaching 0.76°C/10 years. Notably, the Sava exhibited a faster increase in water temperature over the last thirty years compared to the Danube. August marked the peak average water temperature for both rivers, while July recorded the highest average air temperature in Belgrade. Despite differing flow rates, both rivers exhibit similar hydrological regimes, with maximum flows occurring in April and minimum flows in August for the Sava, and October for the Danube. Seasonal temperature increases were most pronounced in summer, notably in August, with the smallest rises occurring during cold periods. Additionally, an inverse proportional relationship between mean annual water temperatures and discharges was observed at both river stations.

**Keywords:** air temperature; water temperature; time series; trend analysis; climate change; Sava River; Danube River; confluence; Belgrade; Serbia

**Citation:** To be added by editorial staff during production.

Academic Editor: Firstname Last-name

Received: date

Revised: date

Accepted: date

Published: date

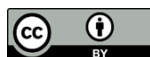

**Copyright:** © 2024 by the authors. Submitted for possible open access publication under the terms and conditions of the Creative Commons Attribution (CC BY) license (<http://creativecommons.org/licenses/by/4.0/>).

## 1. Introduction

Climate change, particularly global warming, has far-reaching consequences on a planetary scale, notably evident in the increasing temperatures of both air and river water (Rabi et al., 2015). This phenomenon affects diverse aspects of life on Earth, garnering interest not only from climatologists and geophysicists but also from economists, politicians, and sociologists (e.g., Demeritt, 2001; Weston, 2015; Lehman, 2020; Miller, 2020). It's crucial to recognize that the manifestation of the warming process varies across locations, influenced by both natural and anthropogenic factors. Consequently, accurate determination of the respective contributions of natural and human-induced impulses to warming is essential for each region (e.g., Webb, 1996; Caissie, 2006; Webb and Nobilis, 2007; Žganec, 2012; Harris, 2020; Beaufort et al., 2020; Kędra, 2020; Heggenes et al., 2021;

Syedhashemi et al., 2020; Zaidel, 2020). For instance, Talke et al. (2023) analyze the temperature increase of the Willamette River in Oregon, USA, concluding that approximately 30% of the rise is attributed to system changes, while 70% is attributed to the warming air temperature, indicative of climate change.

River water temperature, an obvious indicator of climate change, significantly affects all physical, chemical, and biological processes within riverbeds and throughout the basin, particularly in large rivers. The escalating trend of global warming has led to a substantial increase in water temperatures worldwide (Bartholow 2005; Huguet 2008; Isaak 2012; Garner et al. 2013; Marković et al. 2013; Hadzima-Nyarko et al. 2014; Rabi et al. 2015; Arora et al. 2016; Dokulil 2018; Graf and Wrzesiński 2020; Kędra 2020; Michel 2020; Drainas et al. 2023). Water temperature serves as a vital indicator of river health and vulnerability (Fidelibus and Pulido-Bosch 2019; Zhu et al. 2019). Syedhashemi et al. (2022) detailed daily discharge and water temperature reconstructions from 1963 to 2019, along with projections spanning from 1976 to 2100, for 52,278 reaches across the Loire River basin in France (117,000 km<sup>2</sup>). The water temperature of rivers increased across nearly all reaches and seasons from 1963 to 2019, with the most significant increases observed in spring and summer, with median increases of 0.38 °C and 0.44 °C per decade, respectively.

Insufficient attention is often given to the profound impact of rising river water temperatures on societal and social processes in areas surrounding watercourses, where much of the global population resides (Nelson 2007; Ducharme 2008; Bonacci 2016). These detrimental situations primarily occur during warm, rainless periods characterized by low river water levels (Miranda et al. 2024). Mohseni and Stefan (1999) underscore water temperature as a primary factor in studies on the potential effects of global climate change on freshwater ecosystems. Van Vliet et al. (2013) predict an increase in river water temperature and a decrease in low flows in many regions worldwide. Consequently, this could lead to increased deterioration of water quality and freshwater habitats, along with reduced availability of water for human consumption and drinking water production.

River water temperature extremes are significantly influenced during drought events (White et al. 2023). This is a consequence of the combined effects of intense solar radiative forcing and lower river discharges. During drought episodes, flow depths and velocities are reduced, as well as the river's thermal buffering capacity. Tang et al. (2023) found that global lakes are warming slower than surface air temperature due to accelerated evaporation. Nam et al. (2023) indicate that spatial and temporal differences in thermal responses of stream water temperature to water levels are controlled by catchment-scale effects under rapidly changing rainfall patterns. Analyzing lake surface water temperatures for 92,245 lakes during the 1981–2020 period, Tong et al. (2023) concluded that global lake surface water temperature is warming slower than surface air temperature due to accelerated evaporation.

Understanding the response processes and mechanisms of climate change and human activities is imperative for assessing the sustainable development of river ecological environments (Guo et al. 2023). These findings are crucial for guiding water resource management, protecting river eco-hydrological processes, and comprehending their impact on aquatic ecology. Restoring riparian vegetation and shading can mitigate future increases in river water temperature (Caissie 2006; Kail et al. 2021; Syedhashemi et al. 2023). Perry et al. (2016) suggest that this approach can alleviate the impacts of climate change on flood damage to human infrastructure, riparian biodiversity, ecosystem vulnerability, and changes in river discharge.

Caissie (2006) categorized the factors influencing river water temperature into four groups: atmospheric (including solar radiation, air temperature, wind speed, precipitation, evaporation, and condensation); topographic (involving the altitude, latitude, orientation of the flow, riparian vegetation, and subsoil); hydrologic (encompassing discharge, flow velocity, stream depths, width of the water surface, level, and groundwater temperatures); and anthropogenic (influenced by discharge of urban and industrial wastewater,

reductions in flow, artificial reservoirs and diversion canals, removal of riparian vegetation, etc.).

This paper will analyze the specific case of the development of water and air temperature processes at the confluence of the Sava River and the Danube in Belgrade (Serbia). This area represents an important and sensitive environment where the water masses of two large European rivers intersect with the urban area of a rapidly expanding city. It is essential to recognize that these rivers flow through different climatic regions of Europe and meet in the heart of Belgrade, Serbia's capital. Thus, these rivers are an integral part of the city's urban structure. A detailed study and understanding of the trends in air and water temperature of both the Danube and Sava rivers is vital for ensuring the sustainable development of Belgrade.

## 2. Materials and Methods

### 2.1. Study area

After the Volga, the Danube stands as the second-largest European river, with a basin area of 817,000 km<sup>2</sup> and a total length of 2850 km. At its confluence with the Black Sea, the Danube has an average flow of 6700 m<sup>3</sup>/s. The Danube basin area up to the confluence with the Sava is 412,800 km<sup>2</sup>. The geographical coordinates of the Sava and Danube confluence are 40°49'27"N - 20°26'38"E. At the confluence point, the Danube's average flow is estimated at 3600 m<sup>3</sup>/s, and the distance to the Black Sea is 1,170 km.

The Sava River, the largest tributary of the Danube in terms of water volume, has an average annual flow of around 1720 m<sup>3</sup>/s at its confluence near Belgrade. With a catchment area of 95,179 km<sup>2</sup> and a length of 945 km, the Sava is smaller than the Tisa River, which has a catchment area of 157,183 km<sup>2</sup> and a length of 1,358 km. The mean elevation of the Sava River Basin varies from 2,864 m above sea level (a.s.l.) to 70 m a.s.l. at its confluence with the Danube in Belgrade, Serbia. The Sava River basin is home to 8.1 million people across six countries.

At the confluence of the Sava and the Danube (Fig. 1), a distinct contrast in water colour is noticeable, indicating the distinct origins of the rivers' waters. This difference is most evident during low water levels in the summer months. It's important to note the considerable pressures faced by both the Danube River and the Sava River due to various anthropogenic activities and procedures. The Danube, which courses through nine countries, contends with significant challenges arising from these activities. Similarly, the Sava River, with a basin extending across six countries in Southeastern Europe, faces a comparable situation. Figure 2A schematically illustrates the positions of the water measuring stations where water temperatures are monitored along the Danube and Sava rivers. This figure provides values for their datum plane "0" in meters above sea level (m a.s.l.) and the respective basin area A in square kilometres (km<sup>2</sup>).

The literature on the Danube River and its catchment water temperature is extensive (e.g., Webb and Nobilis 1994, 2007; Bonacci et al. 2008; Pekárová et al. 2008; Lovasz 2012; Ducić et al. 2015; Basarin et al. 2016; Bonacci et al. 2022; Pandžić et al. 2022; Pekárová et al. 2023).

Analysis of Danube water temperature in Austria by Webb and Nobilis (2007) concluded that there were significant increases in annual mean values, closely following changes in air temperature. They also suggest that characteristics of the catchment area influence trends in seasonal mean values. Contrasts were observed between sites in a headwater tributary, at the outlet of a catchment with a substantial lake area, and on the mainstream of the Danube. Additionally, evidence suggests that inter-annual variations in water temperature were influenced by the climate pattern of the North Atlantic Oscillation, particularly during the winter months.

The Danube River section in Serbia spans a total length of 587.5 km. During periods of low water flow, the river stretch downstream of Novi Sad is impacted by the Iron Gate backwater (Babić Mladenović et al. 2013). Trend analysis of a 70-year time series (1951-

2019) for annual characteristic water levels, including minimum, mean, and maximum values, confirmed a decreasing trend across all parameters (Đorđević et al. 2023). River regulation activities, industrial dredging, and reductions in natural sediment load are identified as the primary factors driving this decline (Goda et al. 2007). However, the time series for characteristic annual discharges showed neither an increasing nor decreasing trend.

Belgrade, the capital of the Republic of Serbia, is situated at the confluence of the Sava River and the Danube River, marking the boundary between Southeast and Central Europe. As per the 2022 population census, the city is home to 1,685,563 inhabitants. The climate in the broader Belgrade area is classified as continental (Milovanović et al. 2017). According to the Köppen-Geiger scheme developed by Köppen and Geiger in 1936, Belgrade's climate falls under the *Cfa* category. In this classification: *C* indicates that the temperature of the warmest month is equal to or greater than 10°C, and the temperature of the coldest month is less than 18°C but greater than -3°C; *f* denotes precipitation that is fairly evenly distributed throughout the year; and *a* indicates that the temperature of the warmest month is 22°C or above (source: Britannica).

An analysis of air temperatures recorded at 64 stations across Serbia from 1961 to 2010 revealed a trend of increasing temperatures in line with observations across Europe (Bajat et al. 2015). Ruml et al. (2017) further examined the correlation between annual temperature indices and large-scale circulation features at 26 Serbian meteorological stations over the same period. They found that the average annual maximum temperature at these stations exhibited a decreasing trend from 1961 to 1980 but a significant increasing trend from 1981 to 2010, with a regional average rate of 0.56°C per decade. Their analysis also showed that the East Atlantic pattern demonstrated a stronger association with the examined indices compared to the North Atlantic Oscillation and the East Atlantic/West Russia pattern.

A noticeable impact of the urban heat island effect in Belgrade is evident in the significant rise in the average annual mean temperature (Anđelković 2003; Milovanović 2015). At the beginning of the century, this increase averaged 0.04°C per year, whereas in the last six decades, it amounted to 0.09°C. This escalation can be attributed to the rapid population growth and extensive developmental activities within the city. Notably, the UHI effect attains its peak values during the winter season. Comparatively, during the period from 1961 to 1990, Belgrade's average annual temperature was 0.4 to 1.0°C higher than that of smaller surrounding cities (Anđelković 2003). The water temperature of the Sava River is significantly influenced by the thermal power plant located in Obrenovac, which releases a portion of its water into the river. Consequently, the Sava River does not freeze, even during the coldest days of winter. The thermal power plant in Obrenovac is situated on the Sava River, approximately 20 km upstream from its confluence with the Danube. The first block of this thermal power plant commenced operations in March 1970.

## 2.2. Materials

The paper undertook an analysis of the mean annual and monthly water temperatures of the Sava and Danube rivers at their confluence, along with air temperatures in Belgrade, Serbia's capital, spanning 65 years (1956–2020). Mean daily water and air temperatures were collected for each year in a temperature time series, and the annual and monthly averages of these values were calculated.

At the confluence of the Sava and the Danube in Belgrade, flow measurements are not taken for either river. Therefore, the paper utilized Sava flow data from the Sremska Mitrovica water measuring station. The Sava basin area up to Sremska Mitrovica encompasses 87,996 km<sup>2</sup>, accounting for 92.45% of the Sava basin before its confluence with the Danube. For the Danube, flow data from the Bogojovo water station (area: 251,593 km<sup>2</sup>) were utilized, supplemented by the flows of the Tisza near Senta (area: 141,715 km<sup>2</sup>). This approach covers 95.29% of the area of the Danube basin before its confluence with the

Sava. Figure 2B illustrates the positions of the water measuring stations where flow data were obtained for this study.

All data used in the analysis were sourced from the Republic Hydrometeorological Service of Serbia in Belgrade.

### 2.3. Methods

The time series of mean annual water and air temperatures were analyzed using the Rescaled Adjusted Partial Sums (RAPS) method (Garbrecht and Fernandez, 1984). The expression for the calculations RASP is given by:

$$RAPS_k = \sum k \left( \frac{Q_k - Q_{av}}{\sigma_Q} \right)$$

where  $Q_{av}$  is the average value of the analyzed time series consisting of  $n$  members, and  $\sigma_Q$  denotes the standard deviation of the same series. The counter  $k=1,2,\dots, n$  represents the summation index.

Linear trend time series were computed, and in one instance, a parabolic trend was considered. The regression line equation for the linear trend of the analyzed time series is as follows:

$$Y = (a \times t) + b$$

Here,  $Y$  denotes one of the five parameters in the year  $t$ , while  $a$  and  $b$  represent linear regression coefficients calculated using the least squares method. The coefficient  $a$  represents the slope of the regression line, measured in degrees Celsius per year during the analyzed time series. It indicates the average intensity of the trend of increasing or decreasing values of the analyzed time series.

Determination coefficients  $R^2$  were defined for linear trends, while correlation index  $IR^2$  was calculated for parabolic trends. The statistical significance of linear trends was assessed using the Mann-Kendall test (Mann, 1945; Kendall, 1975; Husain Shourov and Mahmud, 2019).

The F-test and t-test were utilized to determine the statistical significance of differences between the variances and average values of adjacent time sub-periods. The F-test was employed to assess the statistical significance of the variances, while the t-test was used to evaluate the statistical significance of the average values of two adjacent time sub-periods (McGhee 1985). Probability values  $p < 0.01$  and  $0.01 < p < 0.05$  were utilized as the levels of statistical significance for the differences in all three tests.

## 3. The analysis of mean annual water and air temperatures

The series of mean annual water temperatures of the Danube (blue), Sava (red), and the air temperature of Belgrade (green) for the period 1956-2020 are presented in Fig. 3. The directions of the increasing trends are illustrated, along with their respective linear regression expressions. Additionally, the values of the determination coefficients ( $R^2$ ) and the probability values ( $p$ ) determined by the Mann-Kendall (M-K) test are provided.

During the 65 years analyzed (1956-2020), the average values of mean annual water temperatures were recorded as 13.7°C for the Sava, 12.3°C for the Danube, and 12.5°C for Belgrade mean annual air temperature. Notably, the minimum and maximum mean annual water temperatures measured at the Sava were 12.0°C (in 1976) and 15.6°C (in 2000), respectively. For the Danube, corresponding values were 10.6°C (in 1980) and 14.2°C (in 2018), while for Belgrade air temperature, they were 10.8°C (in 1976) and 14.8°C (in 2019).

Across all three analyzed series, statistically significant increasing trends were observed. Specifically, the largest increase was noted in the Sava water temperature range, with a rate of 0.44°C per decade. For the Danube, this increase amounted to 0.39°C per decade, while for the series of mean annual air temperatures in Belgrade, the increase amounted to 0.34°C per decade.

Using the RAPS method, the behaviour of the time series of mean water and air temperatures analyzed in this work was examined. Figure 4 illustrates the behaviour of their RAPS values during the 1956-2020 period.

In the Danube water temperature series, RAPS proved the existence of two subseries: 1956-1988 and 1989-2020. The average values of the first and second subseries are 11.7°C and 12.9°C, respectively. The F-test indicates no statistically significant difference between the variances of the subsets ( $p=0.629$ ), while the t-test indicates a statistically significant difference in the average values of the subsets ( $p=4.5E-11$ ).

Similarly, in the Sava water temperature series, RAPS identified two subseries: 1956-1989 and 1990-2020. The average values of the first and second subseries are 12.9°C and 14.6°C, respectively. The F-test indicates no statistically significant difference between the variances of the subsets ( $p=0.053$ ), while the t-test indicates a statistically significant difference in the average values of the subsets ( $p=8.2E-15$ ).

For the Belgrade air temperature series, RAPS identified two subseries: 1956-1997 and 1998-2020. The average values of the first and second subseries are 12.0°C and 13.5°C, respectively. The F-test indicates no statistically significant difference between the variances of the subsets ( $p=0.151$ ), while the t-test indicates a statistically significant difference in the average values of the subsets ( $p=2.0E-12$ ).

Figure 5 displays pairs of subseries defined by the RAPS method (Fig. 4). It is notable that all six subseries exhibit increasing trends, yet in the initial sub-period, none of the trends are statistically significant at the  $p<0.01$  level. However, in recent sub-periods, all growth trends become statistically significant. The most substantial increase is observed in the series of mean annual air temperatures in Belgrade during the sub-period 1998-2020, averaging 0.762°C per decade. This increase is over 3.7 times higher than in the previous sub-period (1956-1997), where it was 0.207°C per decade. The trends of water temperature rise in both rivers appear similar, indicating a notable intensification of the Urban Heat Island (UHI) effect in Belgrade in recent years.

In Figure 6, the series of differences between the mean annual temperatures measured at the three stations analyzed in this paper are depicted. While all three cases exhibit increasing trends, none are statistically significant. Notably, the difference between Sava water temperatures and Belgrade air temperatures ( $\Delta T = TWS - TAB$ ) has decreased since the early 1990s, possibly due to the sudden increase in the UHI effect in Belgrade. Drawing a parabola instead of a line emphasizes this decreasing trend more clearly.

Figure 7 illustrates the relationship between the mean annual water temperatures of the Sava and Danube rivers. The coefficient of determination ( $R^2=0.736$ ) indicates a significant similarity in water temperature regimes. Only in 1974 was the mean annual water temperature of the Danube higher than that of the Sava.

Table 1 presents the values of the determination coefficients ( $R^2$ ) between the series of mean annual water temperatures of the Danube (TWD), Sava, (TWS), the mean annual air temperatures of Belgrade (TAB), and the flow of the Danube (QD) and Sava (QS) for the period 1956-2020. It is noteworthy to observe the high degree of coincidence between the water temperatures of both rivers and the air temperatures of Belgrade.

### 3.1. The examination of the relationship between the mean annual water and air temperatures and the river discharges

River discharge is significantly influenced by water temperature, and their interaction varies for each open stream flow. Understanding this interplay is crucial for ensuring the sustainable development of rivers and their catchments. To achieve this, comprehensive interdisciplinary analyses integrating climate, hydrology, and environmental factors are necessary (Beaufort et al., 2020).

Probst and Mause (2023) highlighted shifts in the discharge seasonality of the Danube River, noting an increase in winter runoff and a decrease in summer runoff. They also observed an elevated risk of both high and low flows along different sections of the Dan-

ube mainstream. Accurate estimations of future river water temperatures and their inter-connection with discharges are of paramount importance, particularly during low water and warm periods of the year (van Vliet et al., 2013). For example, in the Loire River basin, France, Seyedhashemi et al. (2023) found strong evidence of basin-wide increases in water temperature due to rising air temperatures and decreasing streamflow. They proposed that some of these effects of climate change could be alleviated through the restoration and maintenance of riparian forests. Additionally, Prohaska et al. (2023) conducted extensive analyses of low-water discharges in the Sava River around the Drina River confluence.

Figure 8 illustrates the relationships between mean annual water temperatures and the flow of the Sava and Danube rivers from 1956 to 2020. It reveals an inverse proportionality, where an increase in flow corresponds to a decrease in water temperatures. Notably, this relationship is stronger with the Sava River, as indicated by a coefficient of determination ( $R^2$ ) of 0.228, compared to the Danube River, where the  $R^2$  value is 0.090.

#### 4. The analysis of mean monthly water and air temperatures

The study of temperature data on shorter time scales than a year provides insights into the specific behaviour of the analyzed phenomena within the year, often influenced by seasonal climate variations.

Table 2 presents the values of the slope of the regression line ( $a$ ), the coefficient of determination ( $R^2$ ) and the probability of the M-K test ( $p$ ) for the series of mean monthly water and air temperatures observed at the three stations from 1956 to 2020. It is noteworthy that in each month of the year, there are trends of increasing mean monthly temperatures at all three analyzed stations. However, those trends vary significantly throughout the year and across different locations. Probabilities ( $p$ ) less than 0.01 are highlighted in red, while probabilities between 0.01 and 0.05 are highlighted in blue.

The analysis reveals that water temperatures in the Sava and Danube rivers exhibit a statistically significant increase in all months of the year, whereas this is not consistently observed in the air temperatures recorded in Belgrade. Overall, the findings suggest that a more pronounced rise in both water and air temperatures occurs during the warmer part of the year.

Figure 9 presents histograms of average monthly flows of the Sava and Danube rivers over the analyzed period from 1956 to 2020. While there is a similarity between their hydrological regimes, they are not identical. Minimum flows on the Danube occur in October, two months later than on the Sava, while maximum flows are observed in April for both rivers.

Figure 10 shows histograms of average monthly water temperatures of the Danube (blue) and Sava (red) and the air temperature of Belgrade (green) from 1956 to 2020. For a detailed examination of differences across the months, Figure 11 displays histograms depicting the differences between pairs of average monthly temperatures for all three analyzed stations.

Observations indicate that the water temperature of the Sava consistently exceeds that of the Danube throughout the year. The largest difference is observed in August (2.3°C), while the smallest difference occurs in May (0.2°C). Furthermore, the water temperature of the Sava surpasses the air temperature of Belgrade from July to February. Conversely, from March to June, the air temperature in Belgrade exceeds that of the Sava River, with the difference being minimal in March (0.04°C). Additionally, the water temperature of the Danube is lower than the air temperature in Belgrade from February to August, while it exceeds the air temperature from September to January.

#### 5. Conclusions

Protecting the city of Belgrade from the impacts of climate change, particularly the adverse effects of global warming, stands as a critical, intricate, and ongoing endeavour. Given its strategic location at the confluence of two major rivers, the climate of Belgrade is significantly influenced by these water bodies. It is imperative to enhance our understanding and elucidate the interconnections between urban spaces and river dynamics. Scientists, water managers, and policymakers bear the responsibility of implementing measures to prevent or mitigate both natural and anthropogenic impacts on river and urban ecosystems (Blosche, 2018).

The initial step in this multifaceted process involves accurately identifying the causes and implications of future changes in water and air temperatures. Understanding the factors governing the water temperature at the confluence of the Danube and Sava rivers holds immense importance for a major urban agglomeration such as Belgrade. Investigating the response processes and mechanisms of river water temperature to climate change and anthropogenic activities is crucial for assessing the sustainable development of river ecosystems as well as human well-being. The analysis of how thermal regimes have evolved in the past and may evolve in the future is invaluable for the city's evolution and governance, particularly in light of the escalating air temperatures attributed to climate change (van Vliet et al., 2013).

Harris (2022) suggests that given the anthropogenic drivers behind contemporary climate change, it is imperative to incorporate humanity's impact into climate models, particularly in the context discussed in this paper.

Beaufort et al. (2020) highlight the concept of thermal sensitivity, which is based on the relationship between air and water temperature, as a means to quantify a river's sensitivity to future climate change. With river water temperatures expected to rise, understanding the underlying drivers becomes crucial for developing effective mitigation strategies (Hannah et al., 2008).

The main conclusions drawn from the analyses conducted in our study are as follows:

1. Across all three analyzed locations, a consistent upward trend in both water and air temperatures was observed;
2. The highest average temperature over the 65 years was recorded in the Sava River;
3. Sharp increases in water temperatures were observed in 1989 for the Sava and 1990 for the Danube, while the air temperature in Belgrade began rising somewhat later in 1998;
4. The most significant increase in air temperature in the recent period (1998–2020) was observed at the Belgrade observatory, reaching 0.76 °C per decade;
5. The rate of temperature increase in the Sava's water over the last three decades slightly outpaced that of the Danube;
6. Peak average water temperatures for both the Sava and Danube rivers occurred in August, while the highest average air temperature in Belgrade was recorded in July;
7. The average annual flow of the Danube near Belgrade is approximately 2.4 times higher than that of the Sava;
8. While the hydrological regimes of both rivers throughout the year are similar, they are not identical;
9. Maximum average flows for both rivers occur in April, with the minimum average monthly flow occurring in August for the Sava and October for the Danube;
10. The most substantial temperature increases were observed during the summer months, particularly in August, while smaller increases were noted during colder periods of the year;
11. There is an inversely proportional relationship between mean annual water temperatures and river discharges at both observed river stations.



In conclusion, while there are numerous potential causes for the significant upward trends in water and air temperatures observed in the rivers of Belgrade, existing databases and knowledge about these complex processes are insufficient to provide definitive answers to many pressing questions. Further research and understanding of these phenomena are necessary to address these challenges effectively.

**Author Contributions:** “Conceptualization, O.B.; methodology, O.B.; software, D.B.; validation, S.P., S.Č. and T.R.-B.; formal analysis, A.Ž.-Č.; investigation, A.Ž.-Č.; resources, S.Č.; data curation, S.P. and D.B.; writing—original draft preparation, O.B.; writing—review and editing, A.Ž.-Č.; visualization, A.Ž.-Č. and S.P.; supervision, T.R.-B.; project administration, T.R.-B.; funding acquisition, A.Ž.-Č. All authors have read and agreed to the published version of the manuscript.”

**Data Availability Statement:** The data that support the findings of this study is available from the corresponding author upon request. All the data used in this paper is available to the interested parties on demand.

**Conflicts of Interest:** The authors declare no conflicts of interest.

## References

- Anđelković, G. (2003). Osnovne karakteristike beogradskog ostrva toplote. Glasnik Srpskog Geografskog Društva, LXXXIII(1), 15-30.
- Arora, R., Tockner, K., & Venohr, M. (2016). Changing river temperatures in northern Germany: trends and drivers of change. Hydrological Processes, 30(17), 3084–3096. <https://doi.org/10.1002/hyp.10849>
- Babić Mladenović, M., Kolarov, V., & Damjanović, V. (2013). Sediment regime of the Danube River in Serbia. International Journal of Sediment Research, 28(4), 470-485. [https://doi.org/10.1016/S1001-6279\(14\)60006-8](https://doi.org/10.1016/S1001-6279(14)60006-8)
- Bajat, B., Blagojević, D., Kilibarda, M., Luković, J., & Tošić, I. (2015). Spatial analysis of the temperature trends in Serbia during the period 1961–2010. Theoretical and Applied Climatology, 121, 289–301. <https://doi.org/10.1007/s00704-014-1243-7>
- Bartholow, J. M. (2005). Recent water temperature trends in the Lower Klamath River, California. North American Journal of Fisheries Management, 25(1), 152–162. <https://doi.org/10.1577/M04-007.1>
- Basarin, B., Lukić, T., Pavić, D., & Wilby, R. (2016). Trends and multi-annual variability of water temperatures in the River Danube, Serbia. Hydrological Processes, 30(18), 3315-3329. <https://doi.org/10.1002/hyp.10863>
- Beaufort, A., Moatar, F., Sauquet, E., Loicq, P., & Hannah, D. M. (2020). Influence of landscape and hydrological factors on stream–air temperature relationships at regional scale. Hydrological Processes, 34(3), 583–597. <https://doi.org/10.1002/hyp.13608>
- Bloesch, J. (2018). Danube under pressure-a personal analysis. Geomorphologica Slovaca et Bohemica, 18(1), 9-15.
- Bonacci, O. (2016). River - the bloodstream of landscape and catchment. Acta Hydrotechnica, 29(50), 1-12.
- Bonacci, O., Đurin, B., Roje-Bonacci, T., & Bonacci, D. (2022). The Influence of reservoirs on water temperature in the downstream part of an open watercourse: a case study at Botovo Station on the Drava River. Water, 14, 3534. <https://doi.org/10.3390/w14213534>
- Bonacci, O., Trninić, D., & Roje-Bonacci, T. (2008). Analysis of the water temperature regime of the Danube and its tributaries in Croatia. Hydrological Processes, 22(7), 1014-1021. <https://doi.org/10.1002/hyp.6975>
- Caissie, D. (2006). The thermal regime of rivers: a review. Freshwater Biology, 51(8), 1389–1406. <https://doi.org/10.1111/j.1365-2427.2006.01597.x>
- Demeritt, D. (2001). The construction of global warming and the politics of science. Annals of the Association of American Geographers, 91(2), 301–337. <https://doi.org/10.1111/0004-5608.00245>

- Dokulil, M. T. (2018). Climate warming affects water temperature in the River Danube and tributaries – present and future perspectives. *Geomorphologica Slovaca et Bohemica*, 18(1), 57–63. 456  
457
- Drainas, K., Kaule, L., Mohr, S., Uniyal, B., Wild, R., & Geist, J. (2023). Predicting stream water temperature with artificial neural networks based on open-access data. *Hydrological Processes*, 37(10), e14991. <https://doi.org/10.1002/hyp.14991> 458  
459
- Ducić, V., Milenković, M., Milijašević, C., Vujačić, D. M., Bjeljac, Ž., Lovrić, S. L., Gajić, M., Anđelković, G., & Đorđević, A. (2015). Hiatus in global warming - the example of water temperature of the Danube river at Bogojovo gauge (Serbia). *Thermal Science*, 19(Suppl. 2), S467–S476. <https://doi.org/10.2298/TSCI150430133D> 460  
461  
462
- Ducharme, A. (2008). Importance of stream temperature to climate change impact on water quality. *Hydrology and Earth System Sciences*, 12(3), 797–810. <https://doi.org/10.5194/hess-12-797-2008> 463  
464
- Đorđević, D., Tamás, E. A., Mihajlović, L. J., Abonyi, C., Vujnović, A., & Kalocsa, B. (2023). Estimation of changes in sediment transport along the free-flowing middle Danube river reach. *Applied Sciences*, 13, 10513. <https://doi.org/10.3390> 465  
466
- Encyclopedia Britannica. "Köppen climate classification." Available at: <https://www.britannica.com/science/Koppen-climate-classification> (Accessed: 1 Oct. 2023) 467  
468
- Fidelibus, M. D., & Pulido-Bosch, A. (2019). Groundwater temperature as an indicator of the vulnerability of karst coastal aquifer. *Geosciences*, 9(1), 23. <https://doi.org/10.3390/geosciences9010023> 469  
470
- Garbrecht, J., & Fernandez, G. P. (1994). Visualization of trends and fluctuations in climatic records. *Water Resources Bulletin*, 30(2), 297–306. <https://doi.org/10.1111/j.1752-1688.1994.tb03292.x> 471  
472
- Garner, G., Hannah, D. M., Sadler, J. P., & Orr, H. G. (2013). River temperature regimes of England and Wales: spatial patterns, inter-annual variability and climatic sensitivity. *Hydrological Processes*, 28(22), 5583–5598. <https://doi.org/10.1002/hyp.6997> 473  
474
- Goda L, Kalocsa B, Tamás EA (2007) River bed erosion on the Hungarian section of the Danube. *J Environ Sci Sustain Soc* 1:47–54. <https://doi.org/10.3107/jesss.1.47> 475  
476
- Graf R, Wrzesiński D (2020) Detecting patterns of changes in river water temperature in Poland. *Water* 12(5):1327. <https://doi.org/10.3390/w12051327> 477  
478
- Guo W, He N, Wang H, Zhang H, Fu Y (2023) Protecting river eco-hydrological processes: insights from water temperature studies. *Aquatic Sci* 85(4):110. <https://doi.org/10.1007/s00027-023-01006-1> 479  
480
- Hadzima-Nyarko M, Rabi A, Šperac M (2014) Implementation of artificial neural networks in modeling the water-air temperature relationship of the river Drava. *Water Resour Manag* 28(5):1379–1394. <https://doi.org/10.1007/s11269-014-0557-7> 481  
482
- Hannah DM, Webb BW, Nobilis F (2008) River and stream temperature: dynamics, processes, models and implications. *Hydrol Proces* 22(7):899–901. <https://doi.org/10.1002/hyp9992> 483  
484
- Heggenes J, Stickler M, Alfredsen K, Brittain JE, Adeva-Bustos A, Huusko A (2021) Hydropower-driven thermal changes, biological responses and mitigating measures in northern river systems. *River Res Appl* 37(5):743–765. <https://doi.org/10.1002/rra.3788> 485  
486
- Huguet F, Parey S, Dacumb-Castelle D, Malek F (2008) Is there a trend in extremely high river temperature for the next decades? A case study for France. *Nat Haz Earth Syst Sci* 8(1): 67–79. <https://doi.org/10.5194/nhess-8-67-2008> 487  
488
- Husain Shourov MM, Mahmud I (2019) pyMannKendall: a python package for non-parametric Mann Kendall family of trend tests. *J Open Source Software* 4(9):1556. <https://doi.org/10.21105/joss.01556> 489  
490
- Isaak D, Wollrab S, Horan D, Chandler G (2012) Climate change effects on stream and river temperatures across the northwest US from 1980–2009 and implications for salmonid fishes. *Climat Chang* 113(2):499–524. <https://doi.org/10.1007/s10584-011-0326-z> 491  
492
- Kail J, Palt M, Lorenz A, Hering D (2021) Woody buffer effects on water temperature: The role of spatial configuration and daily temperature fluctuations. *Hydrol Proces* 35(1): e14008. <https://doi.org/10.1002/hyp.14008> 493  
494

- Kędra M (2020) Regional response to global warming: water temperature trends in semi-natural mountain river systems. *Water* 12(1):283. <https://doi.org/10.3390/w12010283> 495  
496
- Kendall MG (1975) Rank correlation methods 4th edition. Charles Griffin, London 497
- Köppen W, Geiger R (1936) Handbuch der Klimatologie: Das geographische System der Klimate. Verlag von Gebrüder Borntraeger, Berlin 498  
499
- Lehman J (2020) Making an Anthropocene ocean: synoptic geographies of the International Geophysical Year (1957–1958). *Ann Assoc Am Geogr* 110(3):606–622. <https://doi.org/10.1080/24694452.2019.1644988> 500  
501
- Lovasz G (2012) Water Temperatures of the Danube and Tisza Rivers in Hungary. *Hungarian Geographical Bulletin* 61(4):317–325 502
- Mann HB (1945) Non-parametric test against trend. *Econometrica* 13(3):245–259. <https://doi.org/10.2307/1907187> 503
- Marković D, Scharfenberger U, Schmoltz S, Pletterbauer F, Wolter C (2013) Variability and alterations of water temperatures across the Elbe and Danube River Basins. *Climat Chang* 119(2):375–389. <https://doi.org/10.1007/s10584-013-0725-4> 504  
505
- McGhee JW (1985) Introductory statistics. West Publishing Company, St Paul and New York. 506
- Michel A, Brauchli T, Lehning M, Schaeffli B, Huwald, H (2020) Stream temperature and discharge evolution in Switzerland over the last 50 years: annual and seasonal behaviour. *Hydrol Earth Syst Sci* 24(1):115–142. <https://doi.org/10.5194/hess-24-115-2020> 507  
508
- Milovanović B (2015) Air temperature changes in Serbia and the Belgrade heat island. *J Geographical Institute Jovan Cvijic SASA* 65(1):33–42. <https://doi.org/10.2298/IJGI1501033M> 509  
510
- Milovanović B, Ducić V, Radovanović M, Miliivojević M (2017) Climate regionalization of Serbia according to Köppen climate classification. *J Geographical Institute Jovan Cvijic SASA* 67(2):103–114. <https://doi.org/10.2298/IJGI1702103M> 511  
512
- Miller T (2020) Inviting critical political economy to the table. *Clim Chang* 163(1):155–160. <https://doi.org/10.1007/s10584-020-02937-6> 513  
514
- Miranda VFFV, dos Santos DM, Peres LF, Salvador C, Nieto R, Müller GV, Thielen D, Libonati R. (2024) Heat stress in South America over the last four decades: a bioclimatic analysis. *Theor Appl Climatol* 155(1-2). <https://doi.org/10.1007/s00704-022-03977-x> 515  
516
- Mohseni O, Stefan HG (1999) Stream temperature/air temperature relationship: a physical interpretation. *J Hydrol* 218(3-4):128–141. [https://doi.org/10.1016/S0022-1694\(99\)00034-7](https://doi.org/10.1016/S0022-1694(99)00034-7) 517  
518
- Nam S, Lim H, Choi B, Li Q, Moon H, Choi HT (2023) Responses of stream water temperature to water levels in forested catchments of South Korea. *Forests* 14(10):2085. <https://doi.org/10.3390/f14102085> 519  
520
- Nelson KC, Palmer MA (2007) Stream temperature surges under urbanization and climate change: data, models, and responses. *J Am Water Resour As* 43(2):440–452. <https://doi.org/10.1111/j.1752-1688.2007.00034.x> 521  
522
- Pandžić K, Likso T, Trninić D, Oskoruš D, Macek K, Bonacci O (2022) Relationships between large-scale atmospheric circulation and monthly precipitation and discharge in the Danube River Basin. *Theor Appl Climatol* 148(1-2):767–777. <https://doi.org/10.1007/s00704-022-03977-x> 523  
524  
525
- Pekárová P, Bajtek Z, Pekár J, Výleta R, Bonacci O, Mikláneek P, Belz JU, Gorbachova L (2023) Monthly stream temperatures along the Danube River: Statistical analysis and predictive modelling with incremental climate change scenarios. *J Hydrol Hydromec* 71(4). <https://doi.org/10.2478/johh-2023-0028> 526  
527  
528
- Pekárová P, Halmova D, Miklanean P, Onderka M, Pekar J, Skoda P (2008) Is the water temperature of the Danube River at Bratislava, Slovakia, rising? *J Hydrometeorol* 9(5):1115–1122. <https://doi.org/10.1175/2008JHM948.1> 529  
530
- Perry LG, Reynolds LV, Beechie TJ, Collins MJ, Shafroth P (2015) Incorporating climate change projections into riparian restoration planning and design. *Ecohydrol* 8(5):863–879. <https://doi.org/10.1002/eco.1645> 531  
532

- Probst E, Mauser W (2023) Climate change impacts on water resources in the Danube river basin: a hydrological modelling study using EURO-CORDEX climate scenarios. *Water* 15(1):8. <https://doi.org/10.3390/w15010008>
- Prohaska S, Plavšić J, Čatović S, Bartoš Divac V, Prohaska O, Ilić A, Petković D (2023) Sveobuhvatna analiza malih voda na širem sektoru ušća reke Drine u reku Savu. *Hrvatske Vode* 31(123):37-54. (in Serbian)
- Rabi A, Hadzima-Nyarko M, Šperac M (2015) Modelling river temperature from air temperature: Case of the river Drava (Croatia). *Hydrol Sci J* 60(9):1490–1507. <https://doi.org/10.1080/02626667.2014.914215>
- Ruml M, Gregorić E, Vujadinović M, Radovanović S, Matović G, Vuković A, Počuča V, Stojičić D (2017) Observed changes of temperature extremes in Serbia over the period 1961–2010. *Atmosph Res* 183:26-41. <https://doi.org/10.1016/j.atmosres.2016.08.013>
- Syedhashemi H, Moatar F, Vidal J-P, Diamond JS, Beaufort A, Chandesris A, Valette L (2020) Thermal signatures identify the influence of dams and ponds on stream temperature at the regional scale. *Sci Total Environ* 766(1):142667. <https://doi.org/10.1016/j.scitotenv.2020.142667>
- Syedhashemi H, Moatar F, Vidal J-P, Thiéry D (2023) Past and future discharge and stream temperature at high spatial resolution in a large European basin (Loire basin, France). *Earth System Science Data* 15(7):2827-2839. <https://doi.org/10.5194/essd-2022-451>
- Syedhashemi H, Vidal J-P, Diamond JS, Thiéry D, Monteil C, Hendrickx F, Maire A, Moatar F (2022) Regional, multi-decadal analysis on the Loire River basin reveals that stream temperature increases faster than air temperature. *Hydrol Earth Syst Sci* 26(9): 2583–2603. <https://doi.org/10.5194/hess-2021-450>
- Talke SA, Jay DA, Diefenderfer HL (2023) Warming of the Willamette River, 1850–present: the effects of climate change and direct human interventions. *EGUsphere*. <https://doi.org/10.5194/egusphere-2022-793>
- Tong Y, Feng L, Wang X, Pi X, Xu W, Woolway RI (2023) Global lakes are warming slower than surface air temperature due to accelerated evaporation. *Nature Water*. <https://doi.org/10.1038/s44221-023-00148-8>
- van Vliet MTH, Franssen, WHP, Yearsley JR, Ludwig F, Haddeland I, Lettenmaier DP, Kabat P (2013) Global river discharge and water temperature under climate change. *Global Environ Change* 23(2):450–464. <https://doi.org/10.1016/j.gloenvcha.2012.11.002>
- van Vliet MTH, Ludwig F, Zwolsman, JGG, Weedon GP, Kabat P (2011) Global river temperatures and sensitivity to atmospheric warming and changes in river flow. *Water Resour Res* 47(2):247–255. <https://doi.org/10.1029/2010WR009198>
- Webb BW (1996) Trends in stream and river temperature. *Hydrol Proces* 10(2):205-226. [https://doi.org/10.1002/\(SICI\)1099-1085\(199602\)10:2<205::AID-HYP358>3.0.CO;2-1](https://doi.org/10.1002/(SICI)1099-1085(199602)10:2<205::AID-HYP358>3.0.CO;2-1)
- Webb BW, Hannah DN, Moore RD, Brown LE, Nobilis F (2008) Recent advances in stream and river temperature research. *Hydrol Proces* 22(7):902–918. <https://doi.org/10.1002/hyp.6994>
- Webb BW, Nobilis F (1994) Water temperature behaviour in the River Danube during twentieth century. *Hydrobiol* 291 (2):105-113. <https://doi.org/10.1007/BF00044439>
- Webb BW, Nobilis F (2007) Long-term changes in river temperature and the influence of climatic and hydrological factors. *Hydrol Sci J* 52(1):74 – 85. <https://doi.org/10.1623/hysj.52.1.74>
- Weston D (2015) The political economy of global warming—the terminal crisis. Routledge, Abingdon, UK
- White JC, Khamis K, Dugdale SJ, Jackson FL, Malcolm IA, Krause S, Hannah DM (2023) Drought impacts on river water temperature: A process-based understanding from temperate climates. *Hydrol Proces* 37(10):e14958. <https://doi.org/10.1002/hyp.14958>
- Zhu S, Bonacci O, Oskoruš D, Hadzima-Nyarko M, Wu S (2019) Long term variations of river temperature and the influence of air temperature and river discharge: case study of Kupa River watershed in Croatia. *J Hydrol Hidromec* 67(4):305–313. <https://doi.org/10.2478/johh-2019-0019>
- Zaidel PA, Roy AH, Houle KM, Lambert B, Letcher BH, Nislow KH, Smith C (2020) Impacts of small dams on stream temperature. *Ecological Indicators* 120(2):106878. <https://doi.org/10.1016/j.ecolind.2020.106878>

Žganec K (2012) The effects of water diversion and climate change on hydrological alteration and temperature regime of karst rivers in central Croatia. Environ Monit Assess 184(9):5705–5723. <https://doi.org/10.1007/s10661-011-2375-1>

**Disclaimer/Publisher’s Note:** The statements, opinions and data contained in all publications are solely those of the individual author(s) and contributor(s) and not of MDPI and/or the editor(s). MDPI and/or the editor(s) disclaim responsibility for any injury to people or property resulting from any ideas, methods, instructions or products referred to in the content.
