# Supplementary material for: Trends in Air and Water Temperatures at the Confluence of the Sava and Danube Rivers in Belgrade, Serbia
Source: Preprints.org preprint supplement (doi:10.20944/preprints202404.0252.v1), 2024-04-03
Supplement: Supplementary file 3 [file supplementary]

Archive with 15 entries (15 files):
- Air and Water Temperature Analyses/Air and Water Temperature Analyses MANUSCRIPT.pdf
- Air and Water Temperature Analyses/Figure 1.jpg
- Air and Water Temperature Analyses/Figure 10.jpg
- Air and Water Temperature Analyses/Figure 11.jpg
- Air and Water Temperature Analyses/Figure 2.jpg
- Air and Water Temperature Analyses/Figure 3.jpg
- Air and Water Temperature Analyses/Figure 4.jpg
- Air and Water Temperature Analyses/Figure 5.jpg
- Air and Water Temperature Analyses/Figure 6.jpg
- Air and Water Temperature Analyses/Figure 7.jpg
- Air and Water Temperature Analyses/Figure 8.jpg
- Air and Water Temperature Analyses/Figure 9.jpg
- Air and Water Temperature Analyses/FIGURE CAPTIONS.pdf
- Air and Water Temperature Analyses/Table 1.docx
- Air and Water Temperature Analyses/Table 2.docx
