# Supplementary material for: Trends in Air and Water Temperatures at the Confluence of the Sava and Danube Rivers in Belgrade, Serbia
Source: Preprints.org preprint supplement (doi:10.20944/preprints202404.0252.v1), 2024-04-03
Supplement: Supplementary file 3 [file supplementary › Air and Water Temperature Analyses/Table 1.docx]

**Table 1** Coefficients of determination, R2, between time series of mean annual Danube water temperature, TWD, Sava water temperature, TWS, Belgrade air temperature, TAB, Danube discharge, QD, and Sava discharge, QS, during the 1956-2020 period

| **R2** | **TWD** | **TWS** | **TAB** | **QD** | **QS** |
| --- | --- | --- | --- | --- | --- |
| **TWD** | 1 | 0.736 | 0.760 | -0.088 | 0.149 |
| **TWS** |  | 1 | 0.780 | -0.047 | -0.228 |
| **TAB** |  |  | 1 | -0.017 | -0.113 |
| **QD** |  |  |  | 1 | 0,348 |
| **QS** |  |  |  |  | 1 |
