# Supplementary figures and images for: Trends in Air and Water Temperatures at the Confluence of the Sava and Danube Rivers in Belgrade, Serbia
Source: Preprints.org preprint supplement (doi:10.20944/preprints202404.0252.v1), 2024-04-03

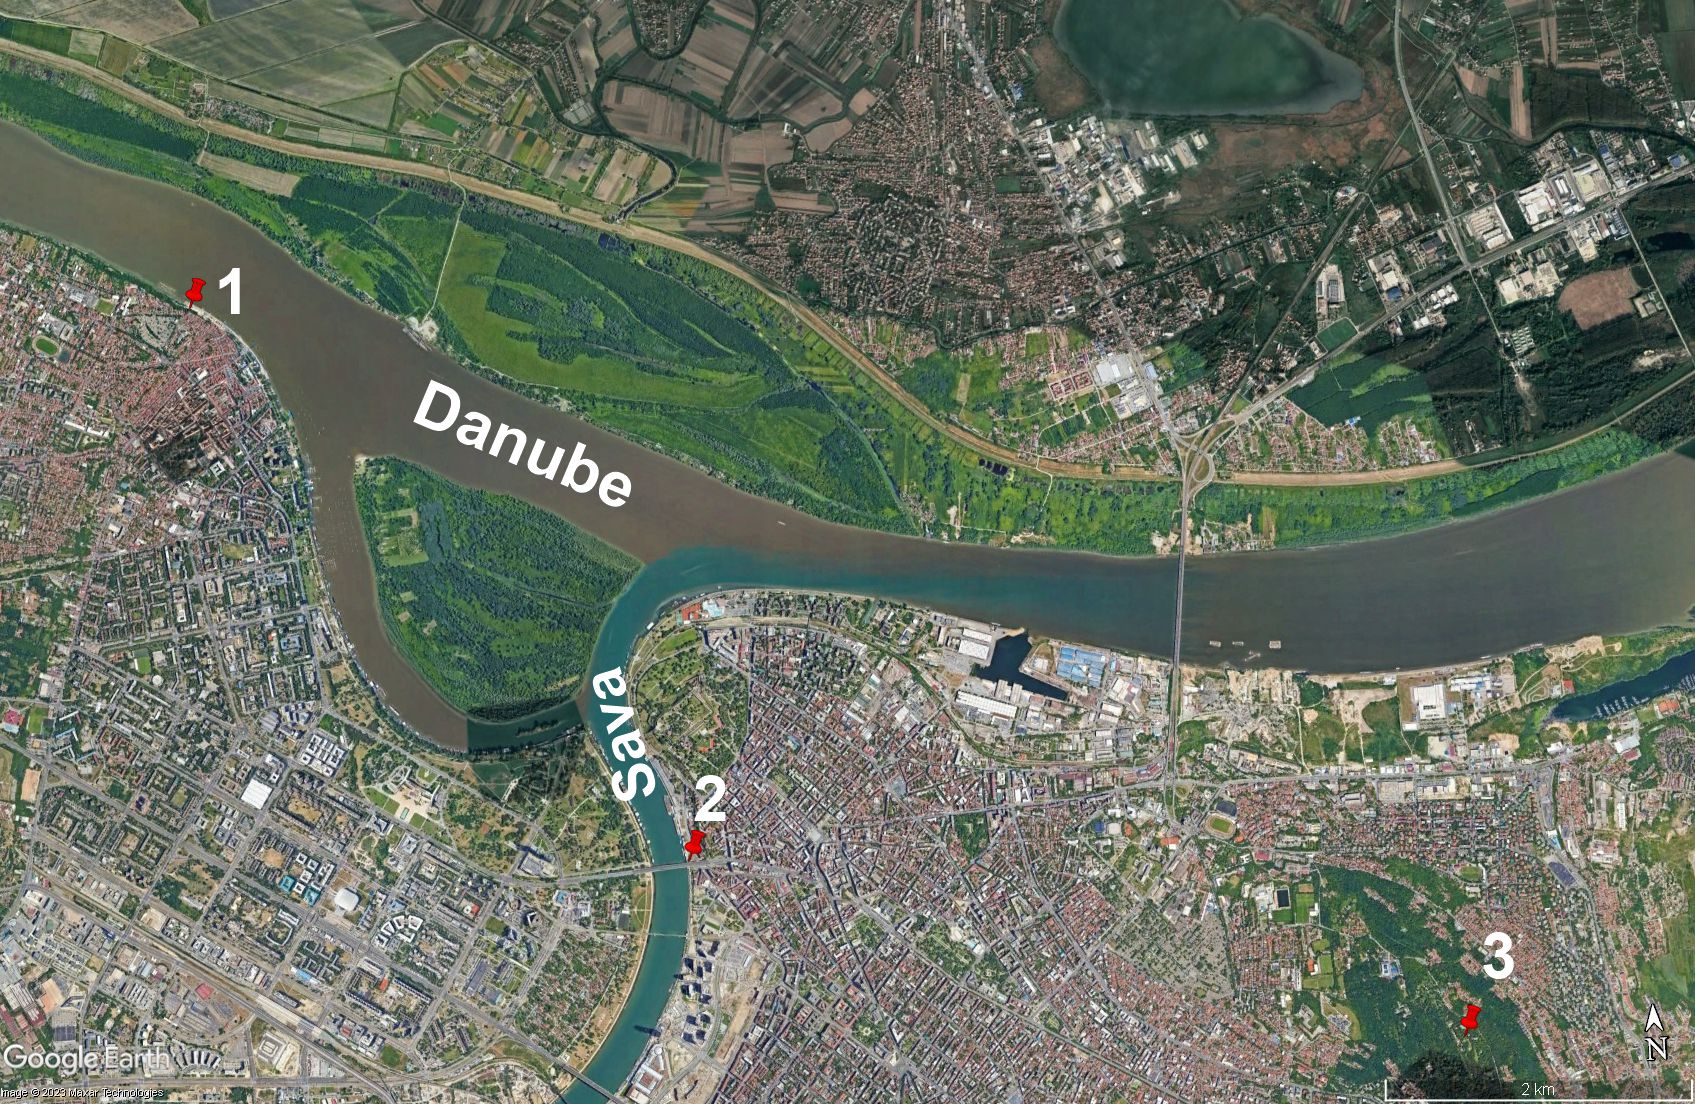

Supplement: Supplementary file 3 [file supplementary › Air and Water Temperature Analyses/Figure 1.jpg]

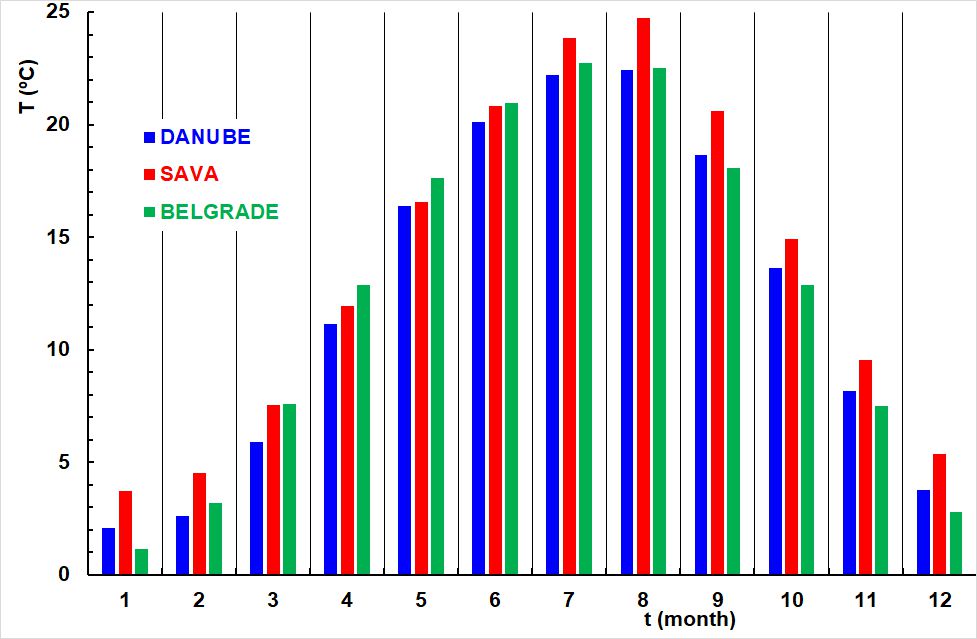

Supplement: Supplementary file 3 [file supplementary › Air and Water Temperature Analyses/Figure 10.jpg]

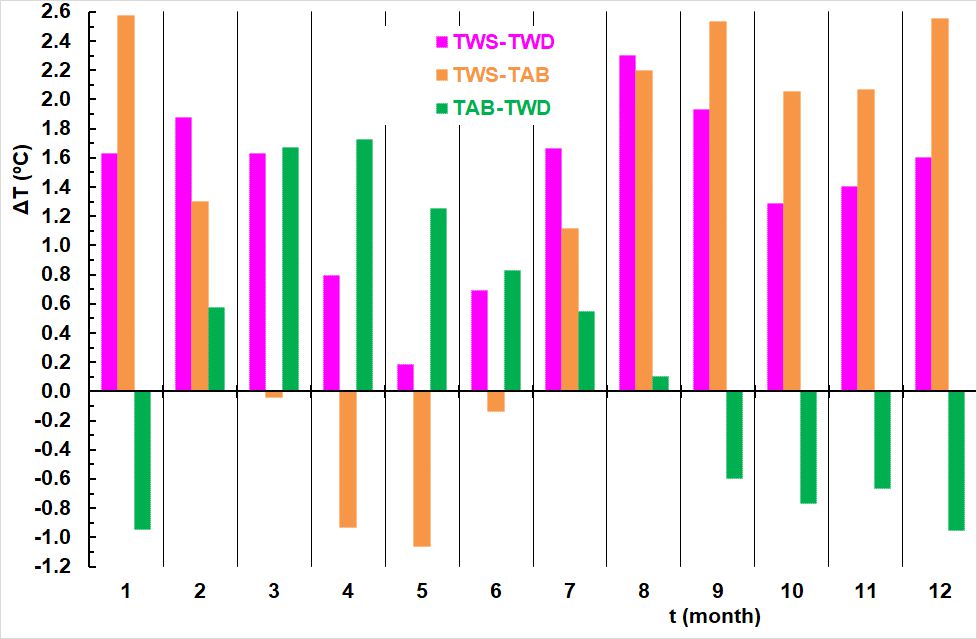

Supplement: Supplementary file 3 [file supplementary › Air and Water Temperature Analyses/Figure 11.jpg]

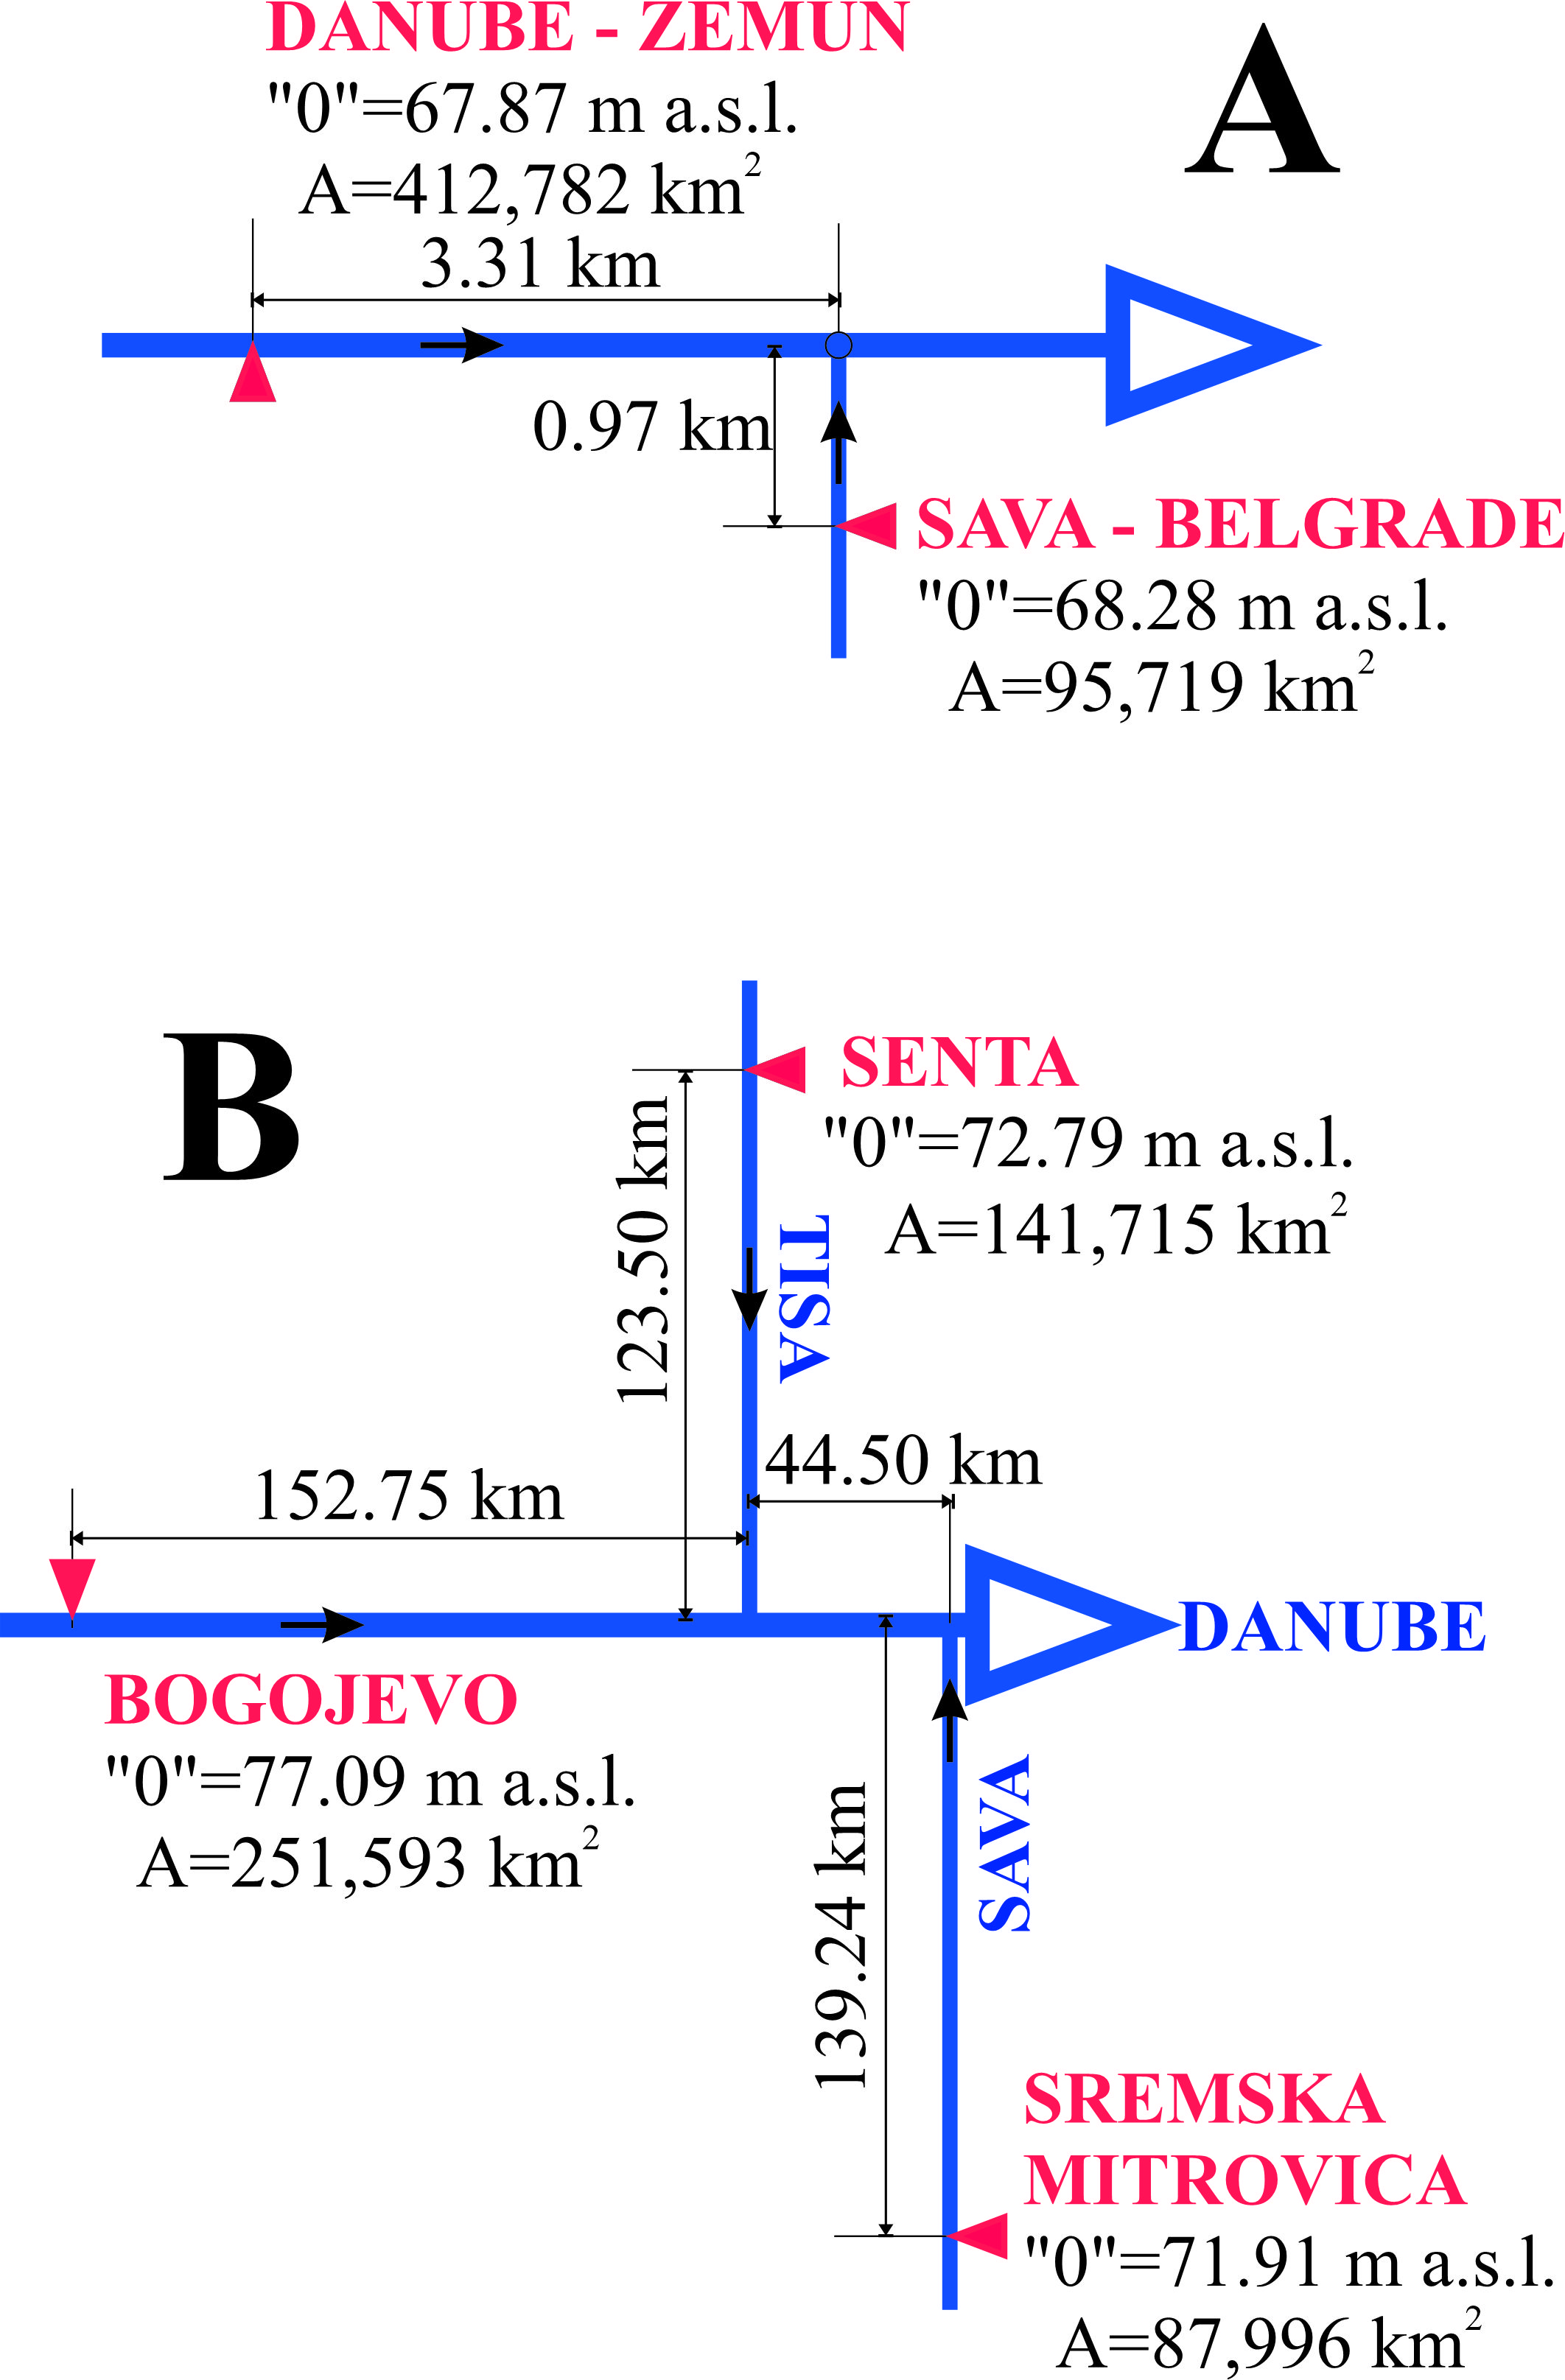

Supplement: Supplementary file 3 [file supplementary › Air and Water Temperature Analyses/Figure 2.jpg]

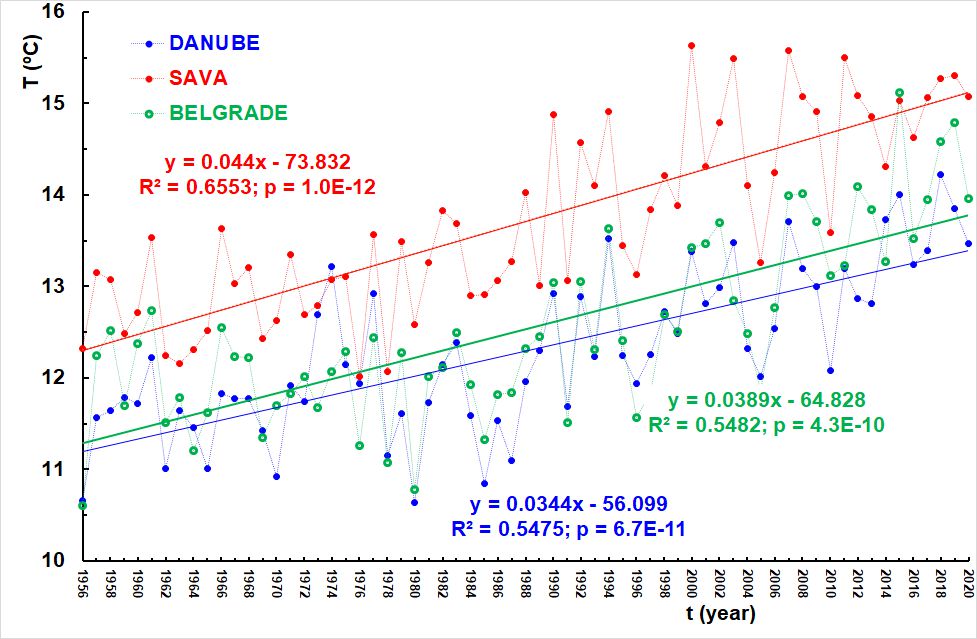

Supplement: Supplementary file 3 [file supplementary › Air and Water Temperature Analyses/Figure 3.jpg]

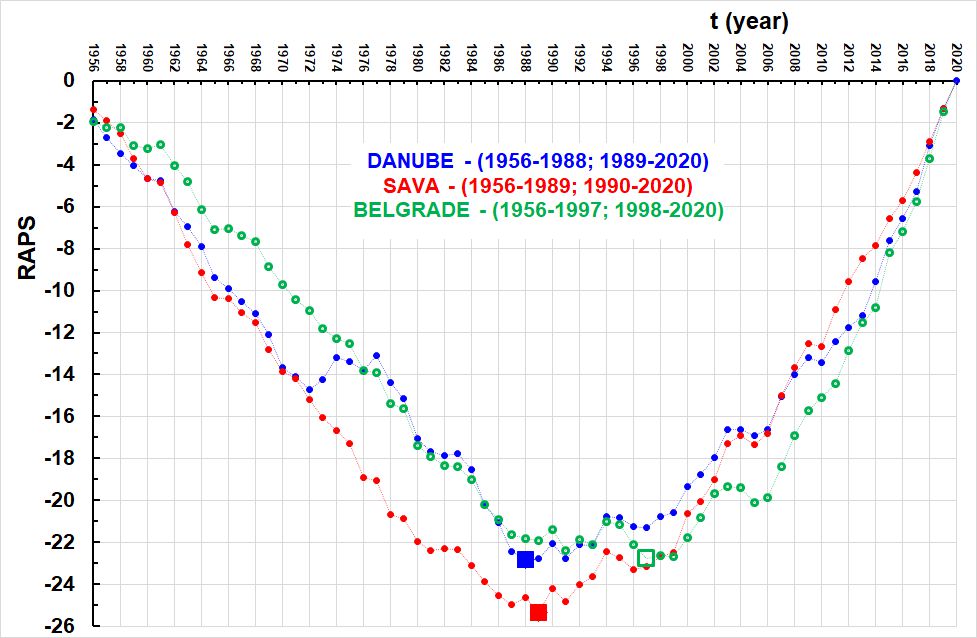

Supplement: Supplementary file 3 [file supplementary › Air and Water Temperature Analyses/Figure 4.jpg]

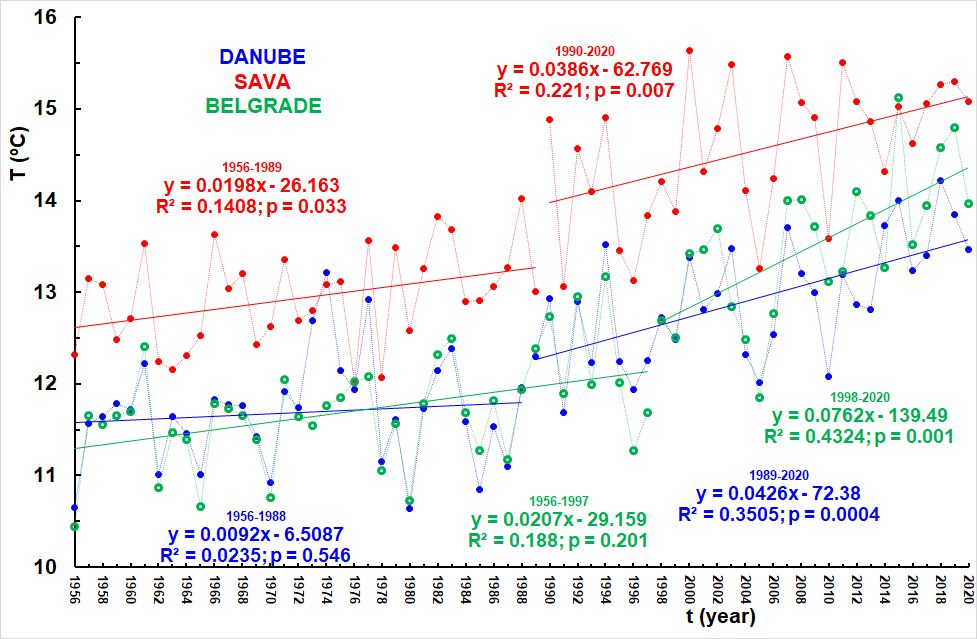

Supplement: Supplementary file 3 [file supplementary › Air and Water Temperature Analyses/Figure 5.jpg]

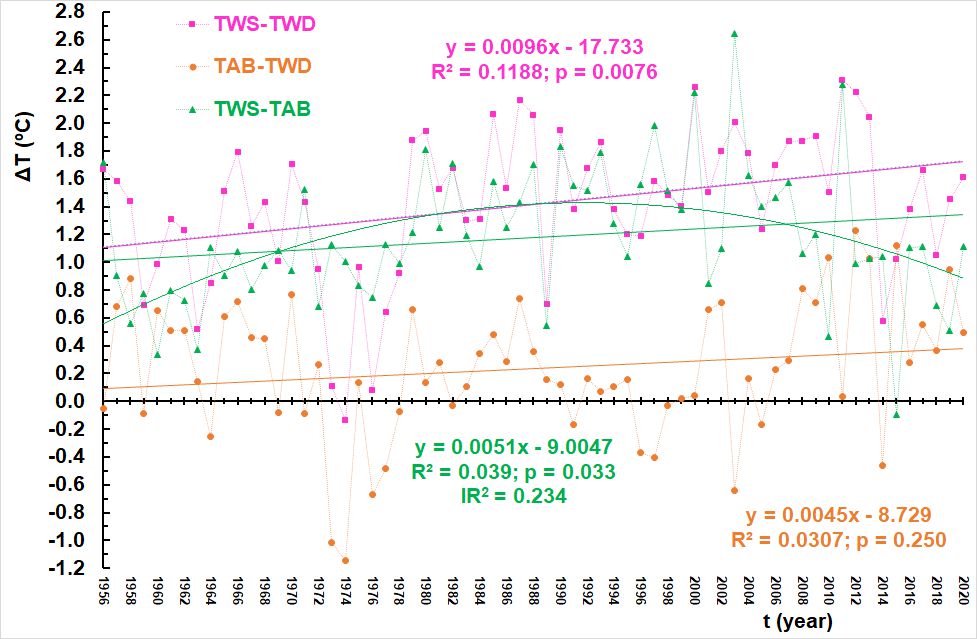

Supplement: Supplementary file 3 [file supplementary › Air and Water Temperature Analyses/Figure 6.jpg]

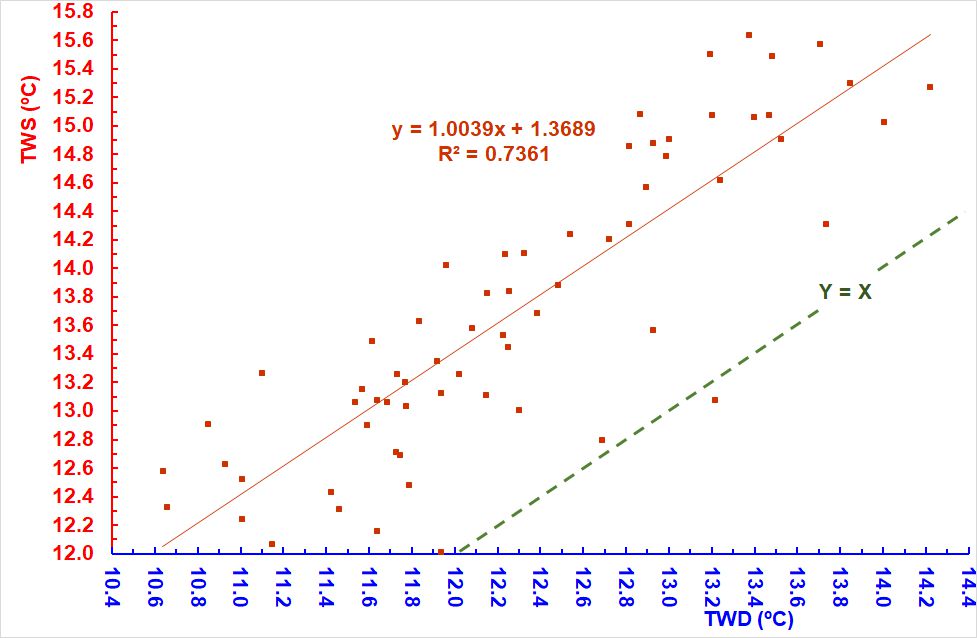

Supplement: Supplementary file 3 [file supplementary › Air and Water Temperature Analyses/Figure 7.jpg]

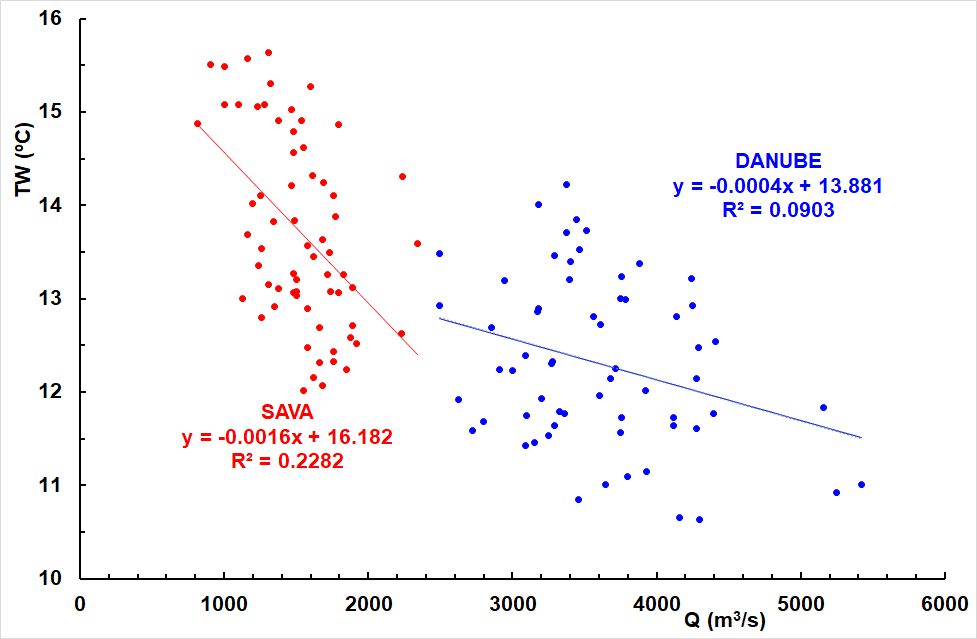

Supplement: Supplementary file 3 [file supplementary › Air and Water Temperature Analyses/Figure 8.jpg]

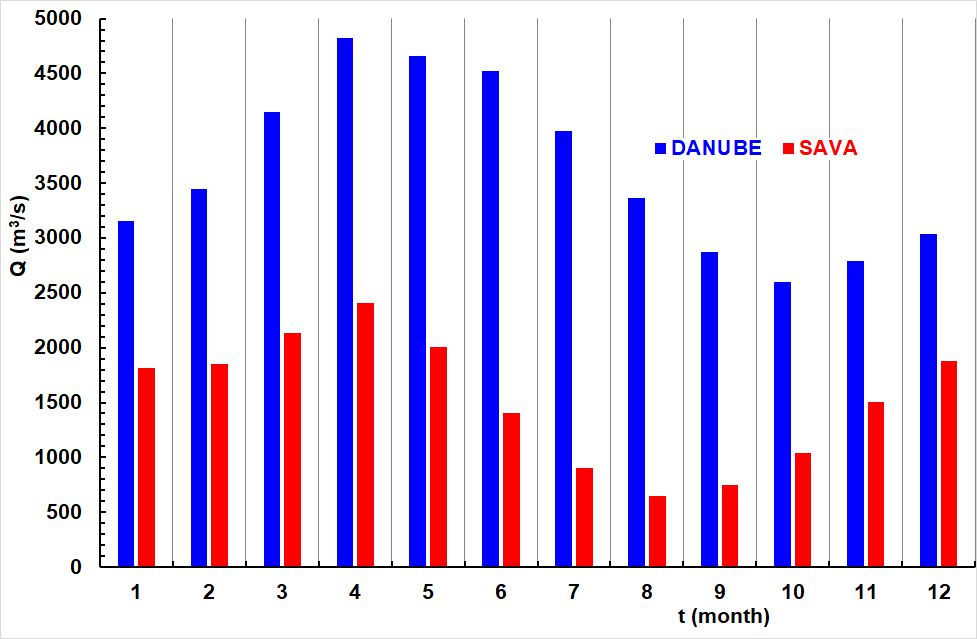

Supplement: Supplementary file 3 [file supplementary › Air and Water Temperature Analyses/Figure 9.jpg]
